# Supplementary material for: Fe ions modulated formation of hollow NiFe oxyphosphide spheres with enhanced oxygen evolution performance
Source: Royal Society of Chemistry journal article supplement (doi:10.1039/c9cc07747b), 2019-01-01
Supplement: c9cc07747b1.pdf [file c9cc07747b1.pdf]

## Electronic Supplementary Information

---

### **Fe ions modulated formation of hollow NiFe oxyphosphide spheres with enhanced oxygen evolution performance**

Yu Jia,<sup>a†</sup> Wei Cai,<sup>ab†</sup> Xiaoyu Li,<sup>a</sup> Xin-Yao Yu<sup>\*ab</sup> and Zhanglian Hong<sup>\*a</sup>

<sup>a</sup>School of Materials Science and Engineering, Zhejiang University, Hangzhou 310027, P. R. China. Email: hong\_zhanglian@zju.edu.cn

<sup>b</sup>Institutes of Physical Science and Information Technology, Anhui University, Hefei 230601, P. R. China. E-mail: yuxinyao@ahu.edu.cn

<sup>†</sup>*These two authors contribute equally to this work.*

## Experimental Section

***Synthesis of yolk-shelled Ni-glycerate spheres:*** The yolk-shelled Ni glycerate spheres were synthesized according to the reference.[1] In a typical synthesis, 7.5 mL of glycerol was dissolved in 52.5 mL of isopropanol (IPA) under magnetic stirring for 10 min in a 100 mL Teflon container. Then, 145 mg of  $\text{Ni}(\text{NO}_3)_2 \cdot 6\text{H}_2\text{O}$  was dissolved in the mixed solution under continuous magnetic stirring. When solution turned clear, 1 mL of  $\text{H}_2\text{O}$  was added into the above solution. After stirring for another 10 min, the container was transferred into a stainless autoclave and put in an electric oven at 200 °C for 12 h. After cooling down to the ambient temperature, the precipitates were collected by centrifugation and washed by ethanol for more than 3 times.

***Synthesis of hollow Ni-glycerate spheres:*** In a typical synthesis, 15 mg of as-prepared yolk-shelled Ni-glycerate spheres were dispersed in 4 mL of ethanol to form solution A. 15 mg of  $\text{Fe}(\text{NO}_3)_3 \cdot 9\text{H}_2\text{O}$  was dissolved in 6 mL of  $\text{H}_2\text{O}$  to form solution B. Then solution B was slowly added into solution A under continuously stirring. After stirring for 2 h, the precipitates were collected by centrifugation and washed by ethanol for more than 3 times.

***Synthesis of hollow NiFe mixed metal glycerate spheres:*** In a typical synthesis, 5 mg of as-prepared hollow Ni-glycerate spheres were dispersed in 4 mL of ethanol to form solution A. 30 mg of  $\text{FeSO}_4 \cdot 7\text{H}_2\text{O}$  was dissolved in 6 mL of  $\text{H}_2\text{O}$  to form solution B. Then solution B was slowly added into solution A under continuously stirring. After stirring for 2 h, the precipitates were collected by centrifugation and washed by ethanol for more than 3 times. For other Ni/Fe ratio samples, the procedure is similar expect for using 15 mg of  $\text{FeSO}_4 \cdot 7\text{H}_2\text{O}$  and 45 mg of  $\text{FeSO}_4 \cdot 7\text{H}_2\text{O}$  for solution B, respectively.

***Synthesis of yolk-shelled NiFe mixed metal glycerate spheres:*** The procedure is similar to that for preparing hollow NiFe mixed metal glycerate spheres, expect for using yolk-shelled Ni-glycerate spheres for solution A.

***Synthesis of hollow NiFe mixed metal oxyphosphide spheres:*** In a typical synthesis, 20 mg of as-obtained hollow NiFe mixed metal glycerate spheres and 200 mg of  $\text{NaH}_2\text{PO}_2$  were put at two ends in a porcelain boat with  $\text{NaH}_2\text{PO}_2$  locating on the upstream side of the tube furnace. Then, the samples were annealed at 300 °C for 2 h

with a ramping rate of  $1^{\circ}\text{C min}^{-1}$  under a flow of argon gas.

***Synthesis of yolk-shelled NiFe mixed metal oxyphosphide spheres:*** The procedure is similar to that for preparing hollow NiFe mixed metal oxyphosphide spheres, expect for using yolk-shelled NiFe mixed metal glycerate spheres for phosphorization.

***Synthesis of hollow Ni oxyphosphide spheres:*** The procedure is similar to that for preparing hollow NiFe mixed metal oxyphosphide spheres, expect for using hollow Ni-glycerate spheres for phosphorization.

***Synthesis of yolk-shelled Ni oxyphosphide spheres:*** The procedure is similar to that for preparing hollow NiFe mixed metal oxyphosphide spheres, expect for using yolk-shelled Ni-glycerate spheres for phosphorization.

***Synthesis of NiFe-LDH:*** In a typical synthesis, 300 mg of urea was dissolved in 35 mL of  $\text{H}_2\text{O}$  under constant magnetic stirring in a 100 mL Teflon container. Then 696 mg of  $\text{Ni}(\text{NO}_3)_2 \cdot 6\text{H}_2\text{O}$  and 323 mg of  $\text{Fe}(\text{NO}_3)_3 \cdot 9\text{H}_2\text{O}$  were added in and dissolved in the solution. After stirring for another 10 min, the container was transferred into a stainless autoclave and put in an electric oven at  $120^{\circ}\text{C}$  for 12 h. After cooling down to the ambient temperature, the precipitates were collected by centrifugation and washed by ethanol for more than 3 times.

### ***Material Characterizations***

The XRD patterns were collected on X'Pert PRO, PANalytical (Cu  $\text{K}\alpha$  radiation,  $\lambda = 1.540598 \text{ \AA}$ ). The morphology and structure of products were characterized using FESEM (Phenom) equipped with EDX, and TEM (JEM-1200EX). The HRTEM images, HAADF-STEM images and elemental images were collected using TEM (Jeol 2100F) equipped with EDX. XPS were carried out on Thermo Scientific K-Alpha+. Raman spectra were collected on an Edinburgh RM5 Raman microscope equipped with a 514 nm excitation laser.

### ***Electrochemical Measurements***

For OER tests, all tests were performed in 1 M KOH. The electrochemical measurements were performed with a CHI 760E electrochemistry workstation (CHI

instruments, Inc., Shanghai) using three-electrode system. Rotating disk electrode (RDE) was used as that working electrode that rotate at 1600 rpm to get rid of generated oxygen bubbles. Hg/HgO electrode and graphite rod was used as reference electrode and counter electrode, respectively. To prepare working electrode, 5.0 mg of catalysts were dispersed in 270  $\mu\text{L}$  of ethanol, 200  $\mu\text{L}$  of  $\text{H}_2\text{O}$ , and 30  $\mu\text{L}$  of 5 wt% Nafion solution for 30 min to form a heterogeneous ink. Then 5  $\mu\text{L}$  of the catalyst ink was dropped onto a polished glassy carbon rotating disk electrode with a diameter of 5 mm ( $0.25 \text{ mg cm}^{-2}$ ). Then, the electrode was dried at ambient temperature. Linear sweep voltammetry was performed at a scan rate of  $5 \text{ mV s}^{-1}$  for polarization curves. Polarization curves were corrected for  $iR$ -compensation. Electrochemical impedance spectroscopy (EIS) of the electrodes were measured in the frequency range from  $10^5$  to 0.1 Hz with 5 mV amplitude. The electrochemically capacitance surface area (ECSA) was estimated from the electrochemical double-layer capacitance ( $C_{\text{dl}}$ , EDLC). The EDLC measurements were carried out by conducting a series of cyclic voltammetry (CV) between 1.14 V and 1.24 V versus RHE at different scan rates. The difference of current densities at 1.19 V versus RHE from different scan rates were plotted with those scan rates. The slope of this fitted line equals to half of  $C_{\text{dl}}$ . For stability tests, working electrodes were prepared by dropping 50  $\mu\text{L}$  of the above-mentioned catalyst ink onto carbon fiber paper with an active surface area of  $0.5 \text{ cm}^2$ . The catalysts were conducted a chronoamperometric test for 20 hours at a static overpotential of 270 mV.

For ORR tests, 0.1 M KOH is used as electrolyte. The configuration is similar to OER tests. Rotating ring-disk electrode (RRDE) with a Pt ring (4 mm diameter for disk electrode, 5 mm inner diameter and 7 mm outer diameter for Pt ring) is used as the working electrode. Saturated Calomel Electrode (SCE) is used as reference electrode. Before the test,  $\text{N}_2/\text{O}_2$  was purged into the 0.1 M KOH for 30 min to achieve  $\text{N}_2/\text{O}_2$  saturated solution. CV curves were then obtained at a scan rate of  $100 \text{ mV s}^{-1}$ . LSV curves were obtained at a scan rate of  $5 \text{ mV s}^{-1}$  in the potential range from 1.0 V to 0.2 V (vs. RHE). EDLC measurements were conducted by a series of CV tests in the potential range from 0.81 V to 1.01 V (vs. RHE).

The H<sub>2</sub>O<sub>2</sub> selectivity ( $\text{HO}_2^- \%$ ) and electrons transferred number ( $n$ ) are calculated by the following formulas:

$$n = \frac{4 \times i_d}{i_d + \frac{i_r}{N}}$$

$$\text{HO}_2^- \% = \frac{200 \times \frac{i_r}{N}}{i_d + \frac{i_r}{N}}$$

Here  $i_d$  is the disk current,  $i_r$  is the ring current and  $N$  is the current collection efficiency of the Pt ring in RRDE electrode (0.424 for this electrode).

### **TOF calculation**

TOF values were calculated according to the following formula:<sup>2</sup>

$$\text{TOF} = \frac{I}{4 \times F \times m}$$

$I$  (ampere) refers to the current at a certain overpotential.  $4$  refers to the number of electrons transferred in 1 mol oxygen evolution.  $F$  refers to Faraday constant (96485 C mol<sup>-1</sup>) and  $m$  is the number of moles of active species.

To estimate  $m$ , we conduct a series of CV tests at different scan rates. A linear plot of oxidation currents and scan rates can be obtained from CV curves. After fitting the slope of the linear plot, the quantity of  $m$  is calculated according to the formula:

$$\text{Slope} = \frac{n^2 F^2 m}{4RT}$$

In this formula,  $n$  is the number of transferred electrons (here  $n=1$ ).  $F$  is Faraday constant,  $m$  is the number of moles of active species.  $R$  and  $T$  are ideal gas constant (8.314 J mol<sup>-1</sup> K<sup>-1</sup>) and absolute temperature (298 K), respectively.

Therefore, TOF values can be obtained based on  $m$  and current at a certain overpotential.



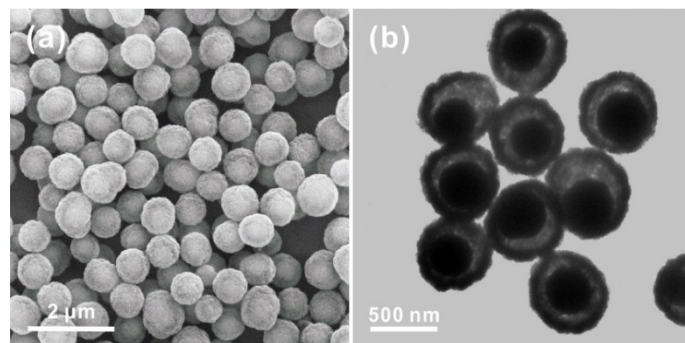

**Fig. S1** (a) FESEM and (b) TEM image of YS-Ni-gly spheres.

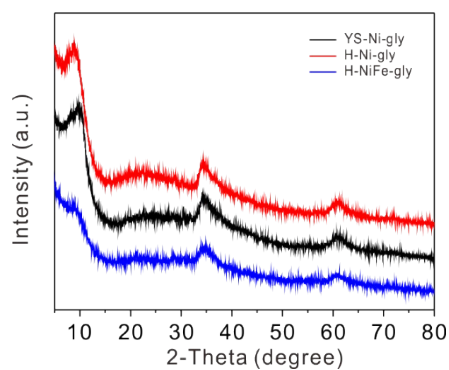

**Fig. S2** XRD patterns of YS-Ni-gly, H-Ni-gly, and H-NiFe-gly spheres.

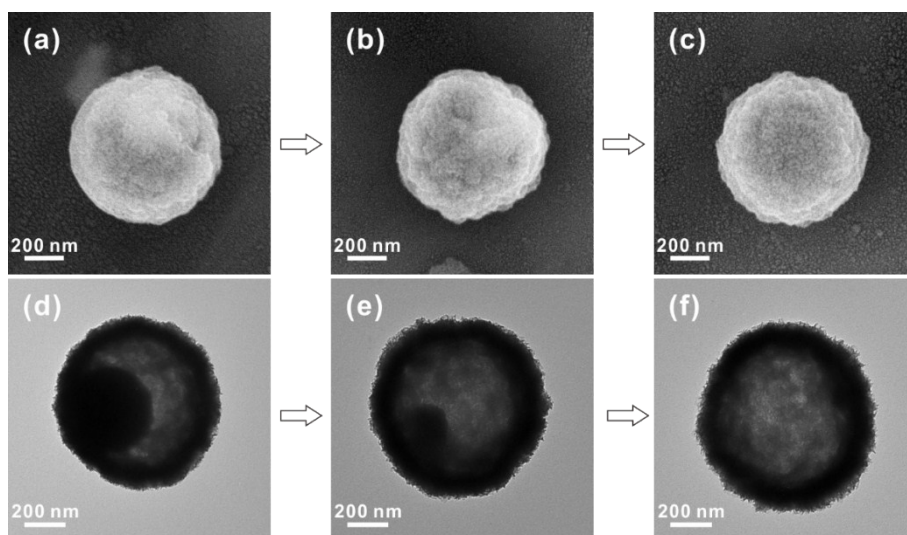

**Fig. S3** Hollowing process of YS-Ni-gly: (a-c) FESEM images and (d-f) TEM images obtained from different reaction time of YS-Ni-gly sphere reacting with  $\text{Fe}^{3+}$  for (a,d) 30 min, (b,e) 1 h, and (c,f) 2 h.

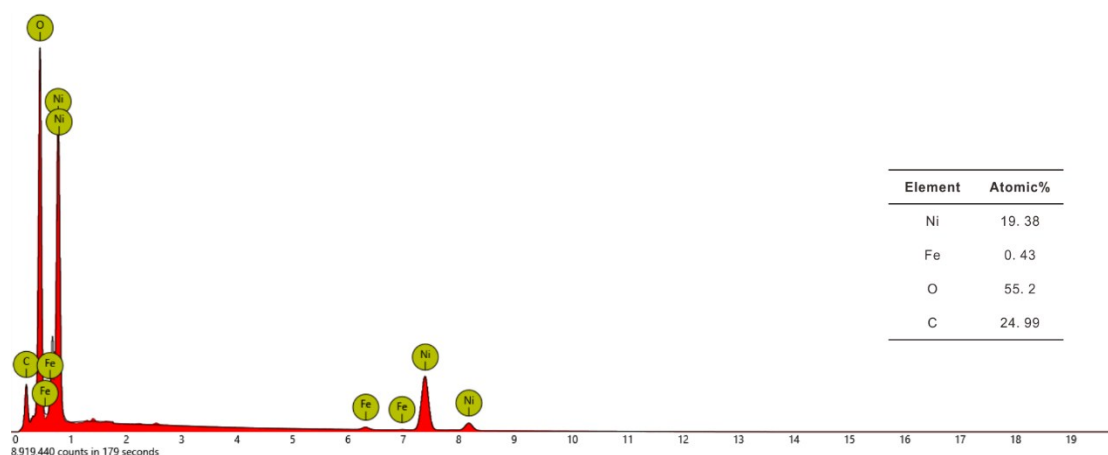

**Fig. S4** EDX spectrum of the YS-Ni-gly spheres after reacting with  $\text{Fe}^{3+}$  for 2 h.

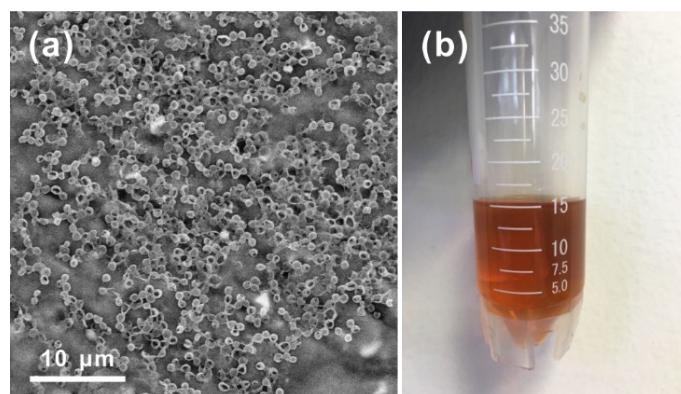

**Fig. S5** (a) FESEM image of the YS-Ni-gly spheres after reacting with  $\text{Fe}^{3+}$  for 4 h; (b) digital image of solution indicating that YS-Ni-gly spheres completely dissolve after reacting with  $\text{Fe}^{3+}$  for 12 h.

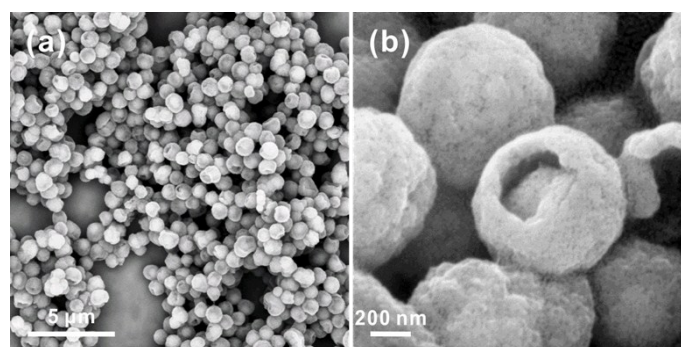

**Fig. S6** (a,b) FESEM images of the YS-Ni-gly spheres after reacting with the HCl solution that has the same pH of  $\text{Fe}(\text{NO}_3)_3$  solution for 2 h.



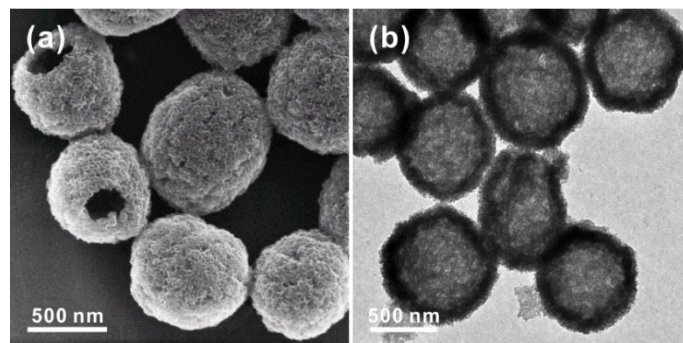

**Fig. S7** (a) FESEM image and (b) TEM image of the YS-Ni-gly spheres after reacting with the  $\text{FeCl}_3$  solution for 2 h. Therefore, a possible redox reaction happens first between the core of YS-Ni-gly and  $\text{Fe}^{3+}$  and the core gradually dissolves. After the core is completely etched out, the shell of YS-Ni-gly begins to react with  $\text{Fe}^{3+}$  and dissolves at last. The preferential etching of the core at first may result from the different thermodynamic characters of the core and the shell in YS-Ni-gly spheres.

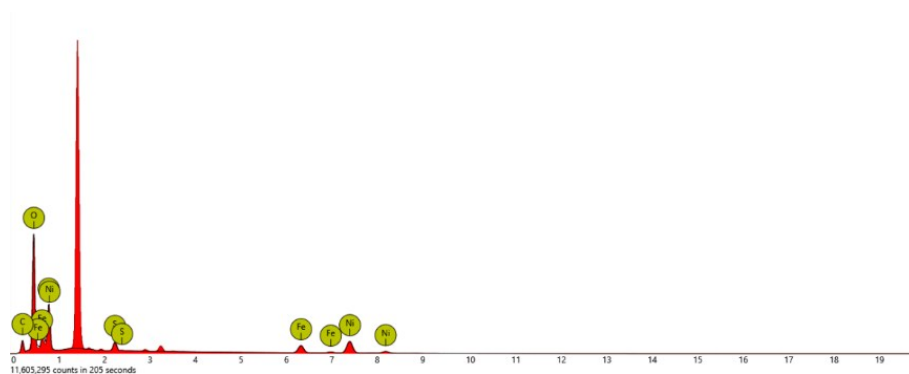

**Fig. S8** EDX spectrum of H-NiFe-gly spheres (the sharp peak at between 1-2 keV is attributed to Al substrate; S element may come from  $\text{FeSO}_4$ ).

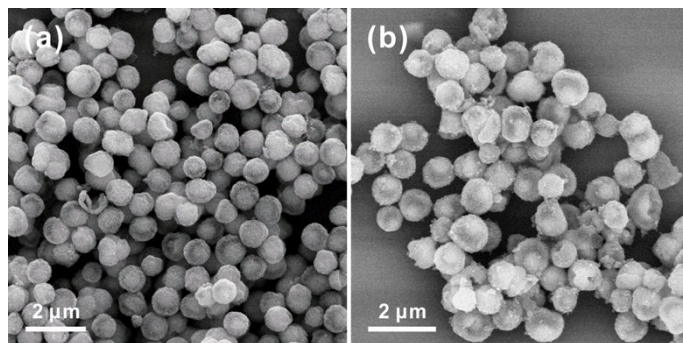

**Fig. S9** FESEM images of (a) YS-Ni-gly spheres after reacting with  $\text{Fe}^{2+}$  for 2 h and (b) YS-Ni-gly spheres after reacting with  $\text{Fe}^{2+}$  for 12 h.

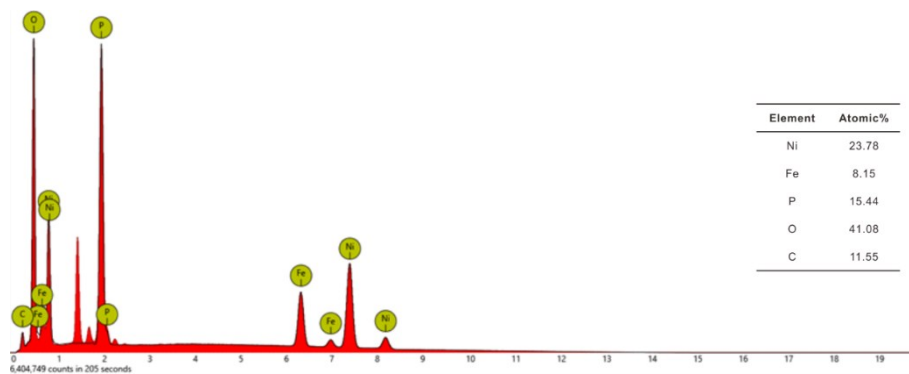

**Fig. S10** EDX spectrum of H-NiFe oxyphosphide spheres.

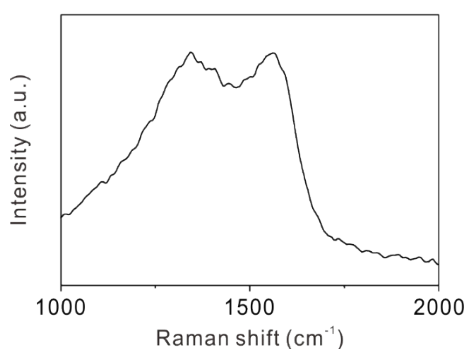

**Fig. S11** Raman spectrum of H-NiFe oxyphosphide spheres.

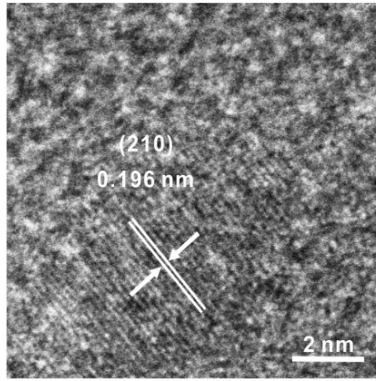

**Fig. S12** HRTEM image of H-NiFe oxyphosphide spheres.

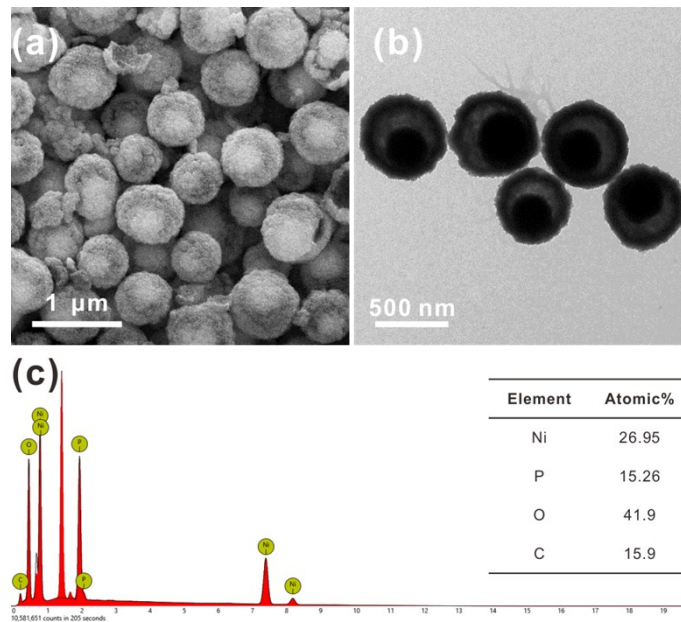

**Fig. S13** (a) FESEM image, (b) TEM image, and (c) EDX spectrum of YS-Ni oxyphosphide spheres.

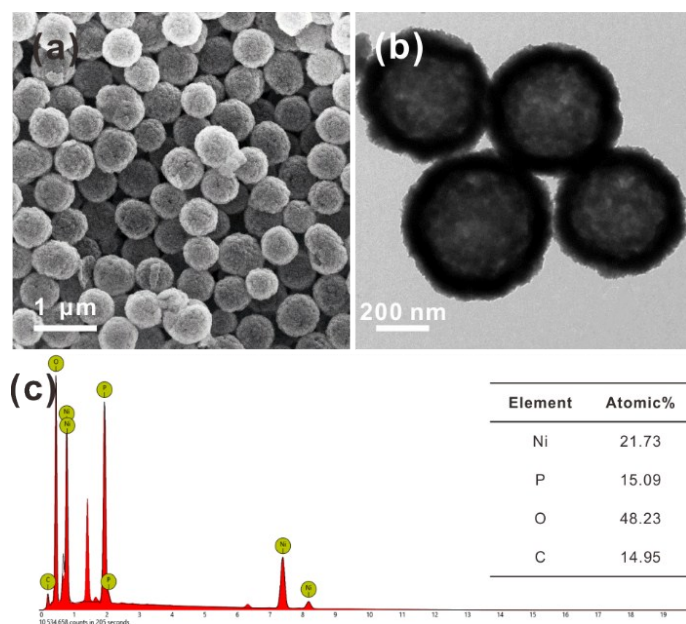

**Fig. S14** (a) FESEM image, (b) TEM image, and (c) EDX spectrum of H-Ni oxyphosphide spheres.

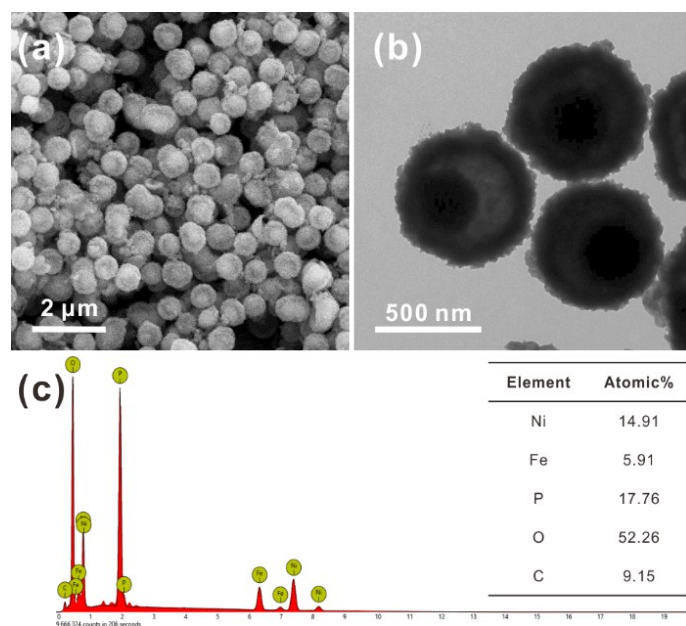

**Fig. S15** (a) FESEM image, (b) TEM image, and (c) EDX spectrum of YS-NiFe oxyphosphide spheres.

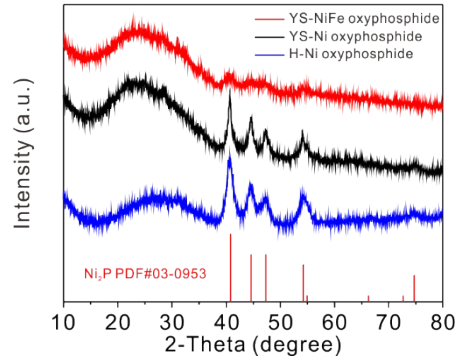

**Fig. S16** XRD patterns of YS-NiFe oxyphosphide spheres, YS-Ni oxyphosphide spheres, and H-Ni oxyphosphide spheres.

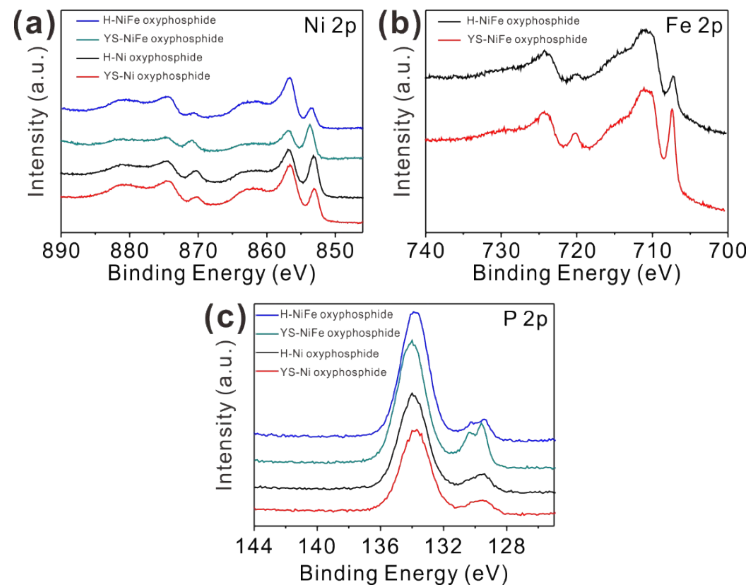

**Fig. S17** (a) Ni 2p, (b) Fe 2p and (c) P 2p XPS spectra of H-NiFe, YS-NiFe, H-Ni, and YS-Ni oxyphosphide spheres.

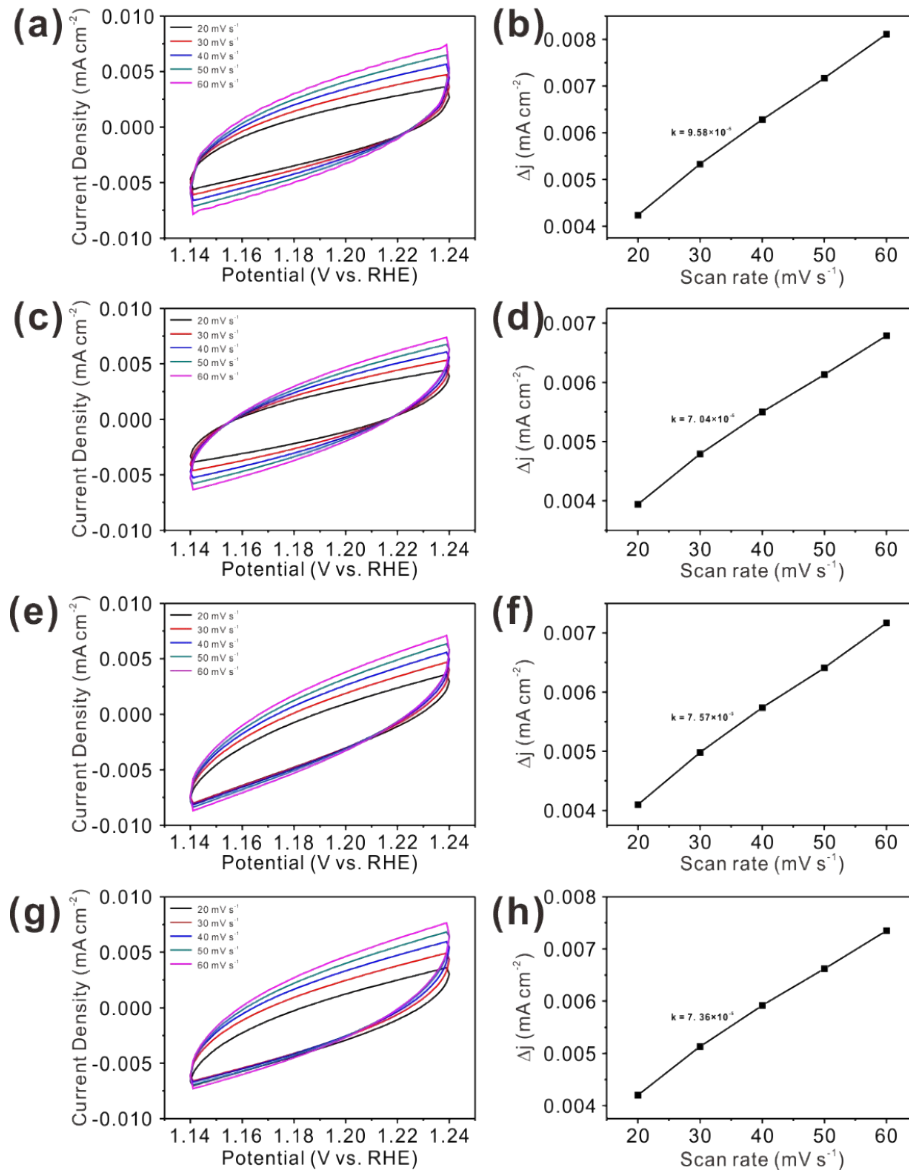

**Fig. S18** CV curves of (a) H-NiFe, (c) YS-NiFe, (e) H-Ni, and (g) YS-Ni oxyphosphide spheres at scan rates of 20, 30, 40, 50, and 60  $\text{mV s}^{-1}$ . (b), (d), (f) and (h) current density difference ( $\Delta j$ ) at 1.19 V plotted as a function of different scan rates derived from (a), (c), (e) and (g), respectively. The value of  $C_{dl}$  equals to half of the slope of the fitted line.

$$\text{For H-NiFe oxyphosphide, } C_{dl} = 0.5 \times 9.58 \times 10^{-5} \times 10^6 \mu\text{F cm}^{-2} = 47.9 \mu\text{F cm}^{-2}$$

$$\text{For YS-NiFe oxyphosphide, } C_{dl} = 0.5 \times 7.04 \times 10^{-5} \times 10^6 \mu\text{F cm}^{-2} = 35.2 \mu\text{F cm}^{-2}$$

$$\text{For H-Ni oxyphosphide, } C_{dl} = 0.5 \times 7.57 \times 10^{-5} \times 10^6 \mu\text{F cm}^{-2} = 37.9 \mu\text{F cm}^{-2}$$

$$\text{For YS-Ni oxyphosphide, } C_{dl} = 0.5 \times 7.36 \times 10^{-5} \times 10^6 \mu\text{F cm}^{-2} = 36.8 \mu\text{F cm}^{-2}$$

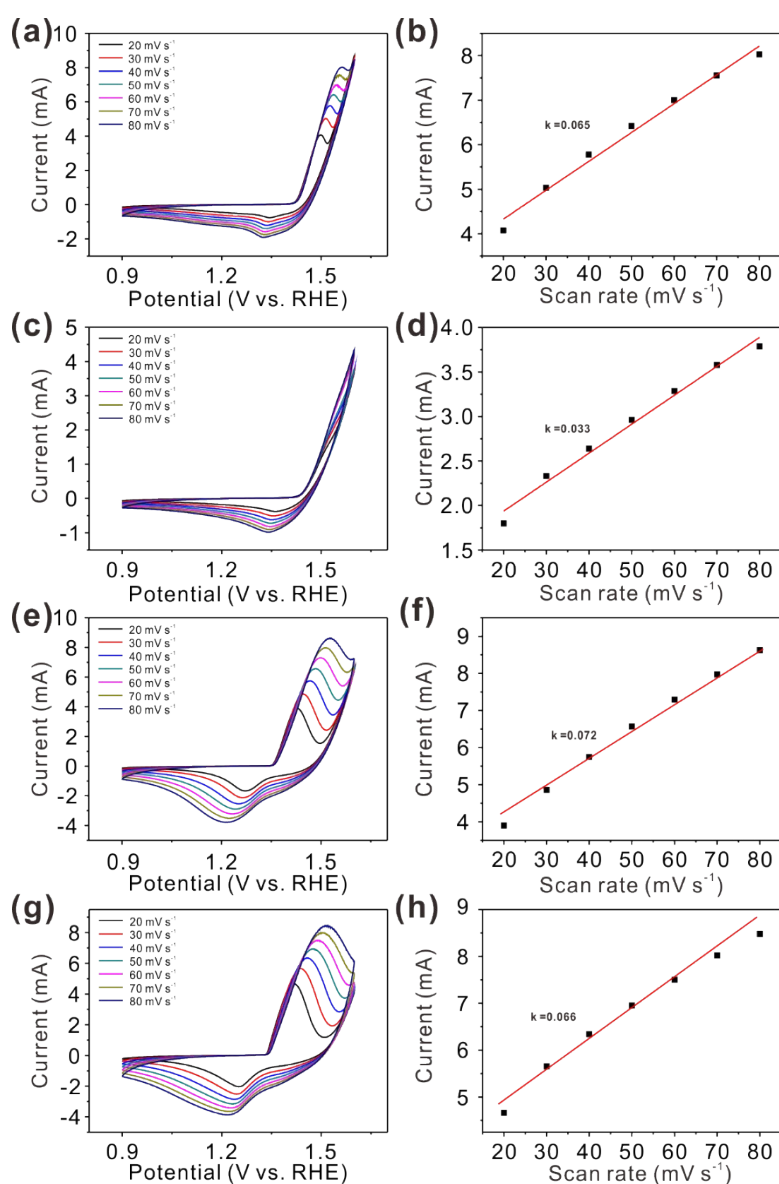

**Fig. S19** CV curves of (a) H-NiFe, (c) YS-NiFe, (e) H-Ni, and (g) YS-Ni oxyphosphide spheres at scan rates of 20~80  $\text{mV s}^{-1}$ , (b), (d), (f) and (h) Linear relationship of the oxidation peak current and scan rates for the corresponding samples.

$$\frac{n^2 F^2 m}{4RT}$$

Based on the formula, Slope =  $\frac{n^2 F^2 m}{4RT}$ ,  $m$  (the number of moles of active species) can be calculated.

$$m_{\text{H-NiFe oxyphosphide}} = 6.92 \times 10^{-8} \text{ mol}, m_{\text{YS-NiFe oxyphosphide}} = 3.51 \times 10^{-8} \text{ mol}$$

$$m_{\text{H-Ni oxyphosphide}} = 7.66 \times 10^{-8} \text{ mol}, m_{\text{YS-Ni oxyphosphide}} = 7.03 \times 10^{-8} \text{ mol}$$

Then TOF values are calculated based on the formula  $TOF = \frac{l}{4 \times F \times m}$ .

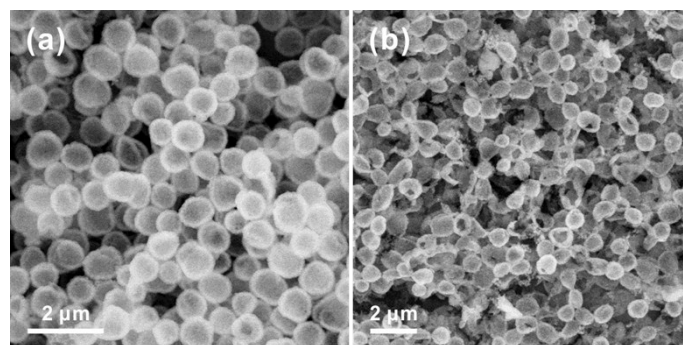

**Fig. S20** FESEM images of the products of H-Ni-gly spheres after reacting with different concentration of  $FeSO_4 \cdot 7H_2O$ : (a)  $2.5 \text{ mg mL}^{-1}$  and (b)  $7.5 \text{ mg mL}^{-1}$ .

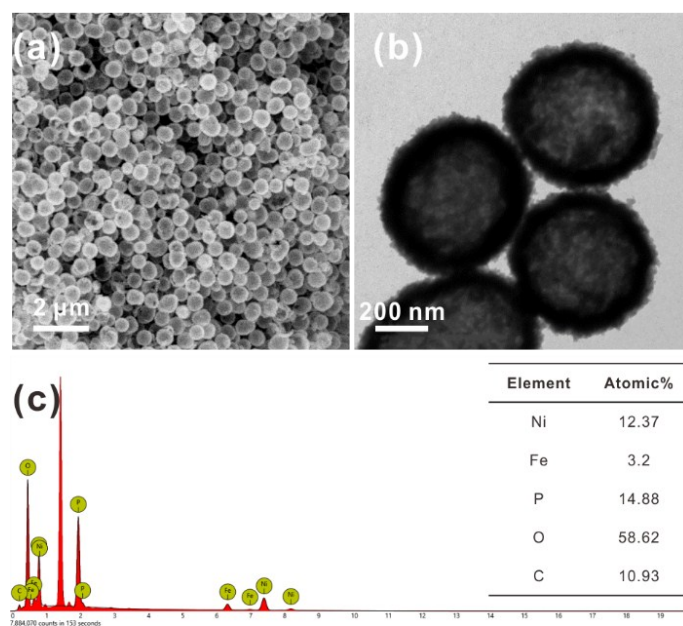

**Fig. S21** (a) FESEM image, (b) TEM image, and (c) EDX spectrum of NFOP-1.



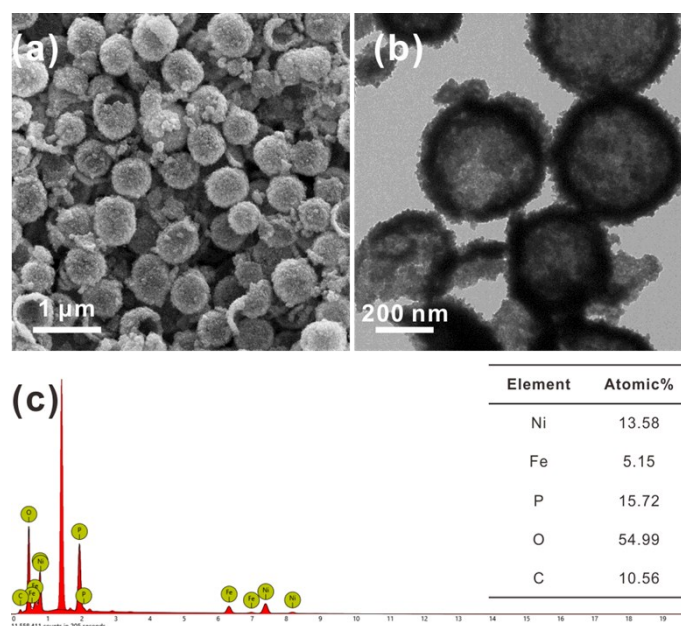

**Fig. S22** (a) FESEM image, (b) TEM image, and (c) EDX spectrum of NFOP-2. The change in the Ni/Fe atomic ratio in NFOP-2 is not proportional to the concentration of  $\text{Fe}^{2+}$ , indicating that the incorporated concentration of Fe using the current ion-exchange method may reach saturation. However, a larger concentration of  $\text{Fe}^{2+}$  will lead to the collapse of the hollow structure.

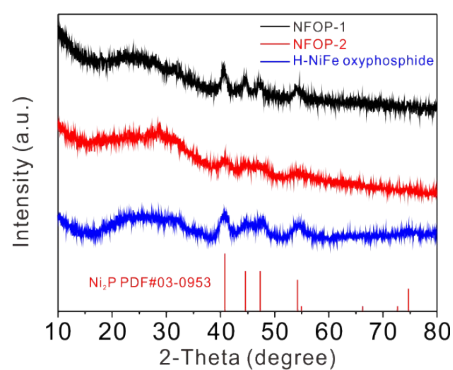

**Fig. S23** XRD patterns of NFOP-1, NFOP-2, and H-NiFe oxyphosphide spheres. The XRD patterns show that NFOP-1 and NFOP-2 have similar diffraction peaks to those of H-NiFe oxyphosphide spheres.

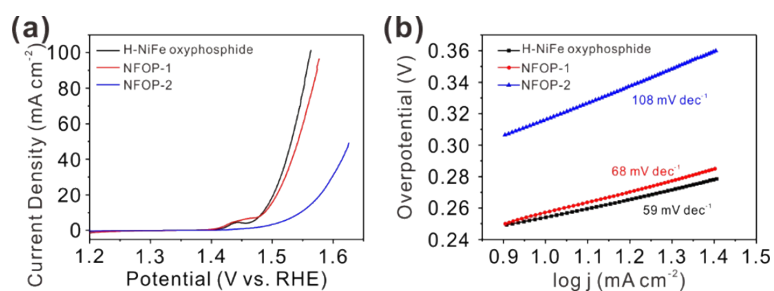

**Fig. S24** (a) LSV curves and (b) Tafel plots of H-NiFe oxyphosphide, NFOP-1, and NFOP-2.

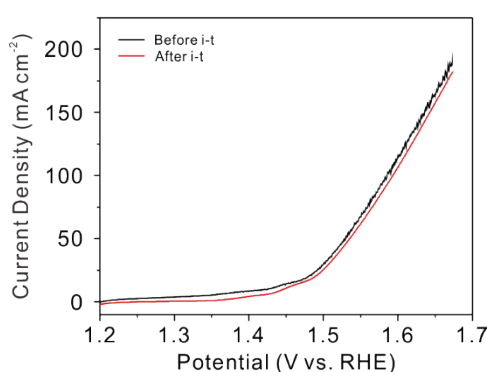

**Fig. S25** LSV curves of H-NiFe oxyphosphide spheres before and after stability test.

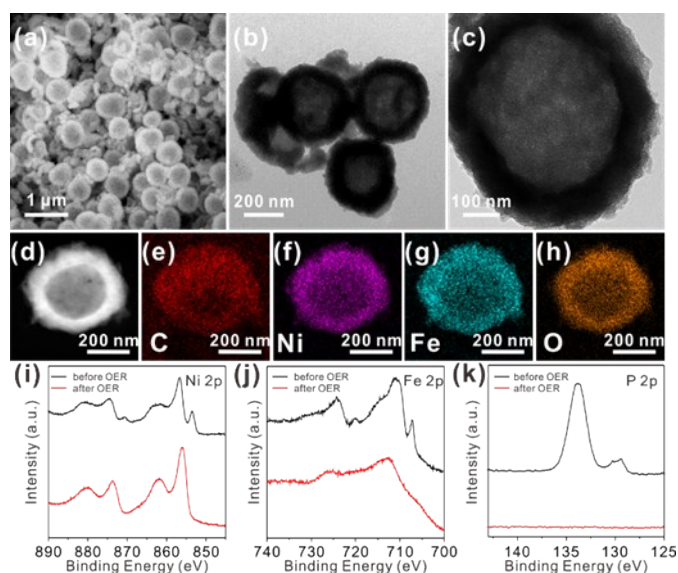

**Fig. S26** (a) FESEM image, (b,c) TEM images, (d-h) HAADF-STEM image and corresponding elemental mapping images of H-NiFe oxyphosphide spheres after 20 hours of stability test. (i-k) XPS spectra of (i) Ni 2p, (j) Fe 2p, and (k) P 2p from H-NiFe oxyphosphide spheres before and after OER stability test.

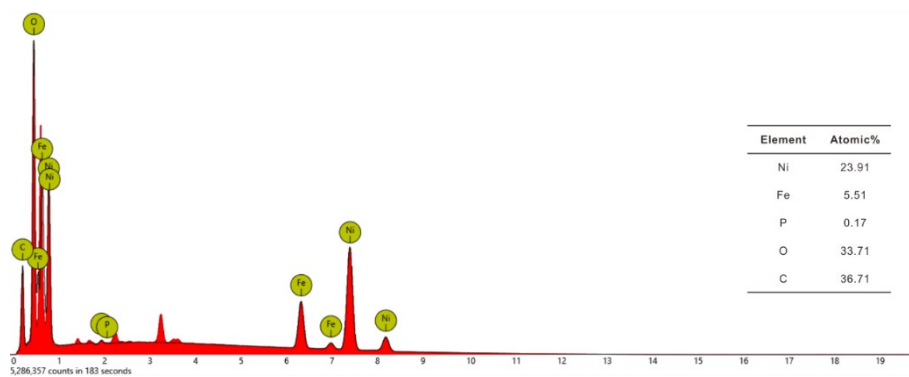

**Fig. S27** EDX spectrum of H-NiFe oxyphosphide spheres after stability test.

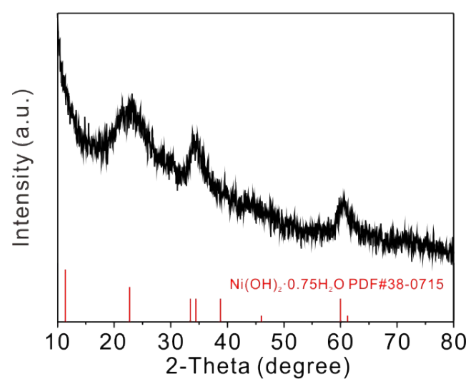

**Fig. S28** XRD pattern of H-NiFe oxyphosphide spheres after stability test.

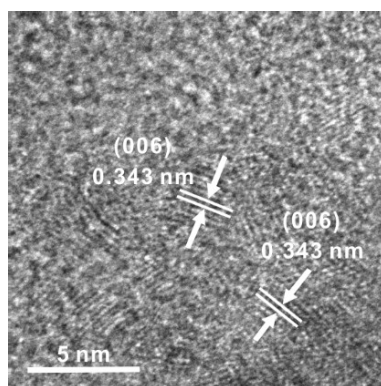

**Fig. S29** HRTEM image of H-NiFe oxyphosphide spheres after stability test.

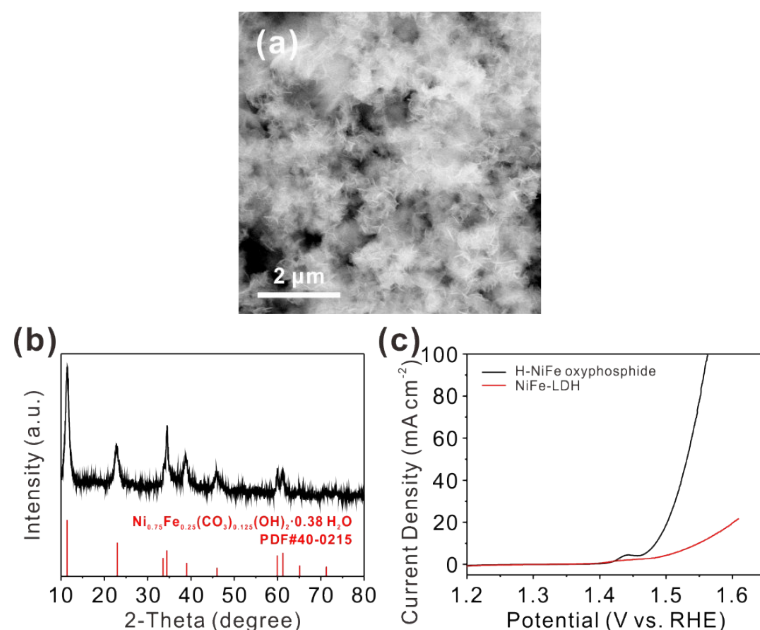

**Fig. S30** (a) FESEM image of NiFe-LDH, (b) XRD pattern of NiFe-LDH, and (c) LSV curves of H-NiFe oxyphosphide spheres and NiFe-LDH.

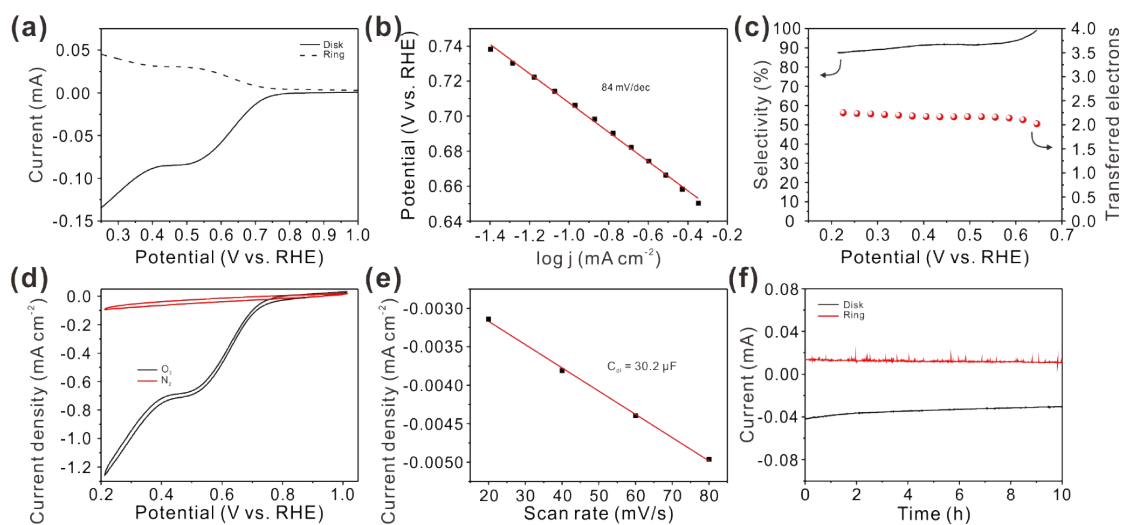

**Fig. S31** (a) LSV curves of H-NiFe oxyphosphide spheres and the ring currents (dash line) measured at ring electrode in  $O_2$ -saturated 0.1 M KOH solution at a rotating speed of 1600 rpm, (b) Corresponding Tafel plots, (c) Calculated  $H_2O_2$  selectivity and the electron transfer numbers of H-NiFe oxyphosphide spheres at different potentials measured by RRDE, (d) CV curves obtained in  $N_2$ -saturated 0.1 M KOH and  $O_2$ -saturated 0.1 M KOH, (e) Current density plotted as a function of different scan rates, (f) Long-term stability tests for H-NiFe oxyphosphide spheres measured by RRDE at a potential of 0.5 V vs. RHE.



**Table S1.** Comparison of the alkaline OER performance of hollow Ni-Fe oxyphosphide in this work with other recently reported metal phosphides-based pre-catalysts.

| Catalysts                                                        | $\eta@10 \text{ mA cm}^{-2}$<br>(mV) | Tafel slope<br>(mV dec <sup>-1</sup> ) | Reference            |
|------------------------------------------------------------------|--------------------------------------|----------------------------------------|----------------------|
| <b>Hollow NiFe<br/>oxyphosphide spheres</b>                      | <b>253</b>                           | <b>59</b>                              | <b>This<br/>work</b> |
| Co-Fe oxyphosphide microtubes                                    | 280                                  | 53                                     | [3]                  |
| Ni-Co-P hollow nanobricks                                        | 270                                  | 79                                     | [4]                  |
| Carbon-incorporated nickel-cobalt mixed metal phosphide          | 330                                  | 96                                     | [5]                  |
| CoMnP nanoparticles                                              | 330                                  | 61                                     | [6]                  |
| FeP-rGO(70:30)@Au                                                | 280                                  | 49.6                                   | [7]                  |
| Ni <sub>0.6</sub> Co <sub>1.4</sub> P nanocages                  | 300                                  | 80                                     | [8]                  |
| Co <sub>2</sub> P nanoneedles                                    | 310                                  | 50                                     | [9]                  |
| Ni <sub>2</sub> P nanoparticles                                  | 290                                  | 59                                     | [10]                 |
| Multishelled Ni <sub>2</sub> P sphere                            | 270                                  | 40.4                                   | [11]                 |
| Ni <sub>2</sub> P/rGO                                            | 260                                  | 62                                     | [12]                 |
| Ni-Fe phosphide nanoparticles encapsulated in N,P,S doped carbon | 265                                  | 43                                     | [13]                 |
| Fe, N-decorated Carbon-supported NiFeP nanoparticles             | 250                                  | 65                                     | [14]                 |
| Ni <sub>1.4</sub> Fe <sub>0.6</sub> P@rGO                        | 210                                  | 33                                     | [15]                 |

## Supplementary references

1. J. H. Cheng, D. Zhao, L. S. Fan, X. Wu, M. X. Wang, N. Q. Zhang and K. N. Sun, *J. Mater. Chem. A*, 2017, **5**, 14519.
2. Q. Liu, L. S. Xie, Z. Liu, G. Du, A. M. Asiri and X. P. Sun, *Chem. Commun.*, 2017, **53**, 12446-12449.
3. P. Zhang, X. F. Lu, J. Nai, S. Q. Zang and X. W. Lou, *Adv. Sci.*, 2019, **6**, 1900576.
4. E. L. Hu, Y. F. Feng, J. W. Nai, D. Zhao, Y. Hu and X. W. Lou, *Energy Environ. Sci.*, 2018, **11**, 872.
5. P. He, X. Y. Yu and X. W. Lou, *Angew. Chem., Int. Ed.*, 2017, **56**, 3897.
6. D. Li, H. Baydoun, C. N. Verani and S. L. Brock, *J. Am. Chem. Soc.*, 2016, **138**, 4006.
7. J. Masud, S. Umaphathi, N. Ashokaan and M. Nath, *J. Mater. Chem. A*, 2016, **4**, 9750.
8. B. C. Qiu, L. J. Cai, Y. Wang, Z. Y. Lin, Y. P. Zuo, M. Y. Wang and Y. Chai, *Adv. Funct. Mater.*, 2018, **28**.
9. A. Dutta, A. K. Samantara, S. K. Dutta, B. K. Jena and N. Pradhan, *ACS Energy Lett.*, 2016, **1**, 169.
10. L. A. Stern, L. G. Feng, F. Song and X. L. Hu, *Energy Environ. Sci.*, 2015, **8**, 2347.
11. H. M. Sun, X. B. Xu, Z. H. Yan, X. Chen, F. Y. Cheng, P. S. Weiss and J. Chen, *Chem. Mater.*, 2017, **29**, 8539.
12. L. T. Yan, H. M. Jiang, Y. L. Xing, Y. Wang, D. D. Liu, X. Gu, P. C. Dai, L. J. Li and X. B. Zhao, *J. Mater. Chem. A*, 2018, **6**, 1682.
13. P. Li and H. C. Zeng, *Chem. Commun.*, 2017, **53**, 6025-6028.
14. S. Ibraheem, S. G. Chen, J. Li, W. Li, X. Y. Gao, Q. M. Wang and Z. D. Wei, *ACS Appl. Mater. Interfaces*, 2019, **11**, 699-705.
15. M. Miao, R. Z. Hou, R. J. Qi, Y. Yan, L. Q. Gong, K. Qi, H. F. Liu and B. Y. Xia, *J. Mater. Chem. A*, 2019, **7**, 18925-18931.
